# Supplementary material for: Roles for mycobacterial DinB2 in frameshift and substitution mutagenesis
Source: eLife. 2023 May 4;12:e83094. doi: 10.7554/eLife.83094 (PMC10159617; doi:10.7554/eLife.83094)
Supplement: Source data 1. [file elife-83094-data1.xlsx]

## Sheet: Figure 1A
		Replicates (arbitrary units)
		1	2	3	Average	SEM
	empty Atc 0	N/A	N/A	N/A	#DIV/0!	#DIV/0!
	empty Atc 2	N/A	N/A	N/A	#DIV/0!	#DIV/0!
	empty Atc 10	N/A	N/A	N/A	#DIV/0!	#DIV/0!
	empty Atc 50	N/A	N/A	N/A	#DIV/0!	#DIV/0!
	tet-dinB2 Atc 0	84.0467	428.943	654.011	389	165.742
	tet-dinB2 Atc 2	770.366	2312.41	3007.85	2030.21	661.14
	tet-dinB2 Atc 10	1558.54	3923.65	4463.22	3315.14	892.001
	tet-dinB2 Atc 50	2351.69	3220.6	4555.88	3376.06	641.026
	tet-dinB3 Atc 0	751.312	186.052	218.873	385.413	183.195
	tet-dinB3 Atc 2	3854.33	2181.98	3170.88	3069.07	485.445
	tet-dinB3 Atc 10	9558.13	3509.01	2547.26	5204.8	2194.3
	tet-dinB3 Atc 50	5312.13	3278.38	3041.17	3877.23	720.713

## Sheet: Figure 1B
		empty			tet-dinB2			tet-dinB2ST			tet-dinB3			tet-dinB3ST			strains
		relicates (OD600)			relicates (OD600)			relicates (OD600)			relicates (OD600)			relicates (OD600)
		1	2	3	1	2	3	1	2	3	1	2	3	1	2	3
	0	0.001	0.001	0.001	0.001	0.001	0.001	0.001	0.001	0.001	0.001	0.001	0.001	0.001	0.001	0.001
	865	0.043	0.042	0.037	0.025	0.023	0.026	0.024	0.026	0.026	0.037	0.035	0.041	0.039	0.036	0.035
	1395	0.329	0.314	0.279	0.073	0.071	0.083	0.071	0.073	0.073	0.291	0.277	0.325	0.304	0.309	0.339
	2290	8.4	9.3	7.8	0.126	0.13	0.159	0.111	0.115	0.103	8.7	7.2	9.6	11.1	9.9	11.7
	2785	60.3	60.3	54.3	0.167	0.218	0.468	0.176	0.252	0.225	71.1	58.5	72.6	83.1	75	88.5
	time
	Average (OD600)	empty	tet-dinB2	tet-dinB2ST	tet-dinB3	tet-dinB3ST	strains
	0	0.001	0.001	0.001	0.001	0.001
	865	0.0406667	0.0246667	0.0253333	0.0376667	0.0366667
	1395	0.307333	0.0756667	0.0723333	0.297667	0.317333
	2290	8.5	0.138333	0.109667	8.5	10.9
	2785	58.3	0.284333	0.217667	67.4	82.2
	time (min)
	SEM (OD600)	empty	tet-dinB2	tet-dinB2ST	tet-dinB3	tet-dinB3ST	strains
	0	0	0	0	0	0
	865	0.00185592	0.000881917	0.000666667	0.00176383	0.00120185
	1395	0.0148137	0.00371184	0.000666667	0.0142517	0.0109291
	2290	0.43589	0.0103976	0.00352767	0.7	0.52915
	2785	2	0.093006	0.0222436	4.47102	3.92301
	time (min)

## Sheet: Figure 1C
		empty			tet-dinB2			tet-dinB3			strains
		1	2	3	1	2	3	1	2	3	replicates (ODU)
	0	3.73134e+07	1.08696e+08	1.1236e+08	1.35747e+08	7.87402e+07	6.06061e+07	5.90406e+07	1.00386e+08	8.57143e+07
	4	1.71206e+08	5.32319e+07	8.47458e+07	1.13821e+08	5.30973e+07	1.05263e+08	1.13208e+08	8.41121e+07	5.06329e+07
	8	1.05263e+08	9.00901e+07	5.46448e+07	7.69231e+07	1.29353e+08	7.1066e+07	96000000	6.1674e+07	1.05263e+08
	16	8.92857e+07	1.23596e+08	1.0356e+08	1.96721e+07	6.71141e+07	2.7972e+07	8.33333e+07	7.09677e+07	4.54545e+07
	24	1.68421e+08	9.14286e+07	1.0687e+08	8.58896e+06	1.35338e+07	1.64557e+07	6.45161e+07	5.12821e+07	8.28402e+07
	time (hour)
	Average (ODunit)	empty	tet-dinB2	tet-dinB3	Strains
	0	8.61229e+07	9.16976e+07	8.17137e+07
	4	1.03061e+08	9.07272e+07	8.26509e+07
	8	8.33327e+07	9.24474e+07	8.76457e+07
	16	1.0548e+08	3.82528e+07	6.65852e+07
	24	1.2224e+08	1.28595e+07	6.62128e+07
	time (hour)
	SEM (ODunit)	empty	tet-dinB2	tet-dinB3	Strains
	0	2.44276e+07	2.26381e+07	1.21019e+07
	4	3.5266e+07	1.89764e+07	1.80785e+07
	8	1.49978e+07	1.85302e+07	1.32583e+07
	16	9.95082e+06	1.46282e+07	1.11521e+07
	24	2.35169e+07	2.29583e+06	9.14948e+06
	time (hour)

## Sheet: Figure 1D
		Replicates (arbitrary units)
		1			2
		rpoB	recA	recA/rpoB	rpoB	recA	recA/rpoB
	Empty 0h	27599.8	14004.1	0.507399
	Empty 4h	24513.8	15395.6	0.628041
	Empty 24h	22690.3	18760.2	0.826791	3704.26	7778.83	2.09997
	tet-dinB2 0h	30073.9	15993.8	0.531817	6288.08	6128.59	0.974636
	tet-dinB2 4h	25153.8	27180.7	1.08058	2203.18	26144.5	11.8667
	tet-dinB2 24h	26234.5	47220.9	1.79995	789.284	16814	21.3028
	tet-dinB3 0h	32477.2	16512.5	0.508435	9755.35	5378.54	0.551343
	tet-dinB3 4h	28117.4	33717.7	1.19918	7959.23	16282.4	2.04573
	tet-dinB3 24h	23929.8	34550.4	1.44382	3151.96	15109.4	4.79366
	/empty	1	2			/empty	Average
	Empty 0h	1	#DIV/0!			Empty 0h	1
	Empty 4h	1	#DIV/0!			Empty 4h	1
	Empty 24h	1	1			Empty 24h	1
	tet-dinB2 0h	1.04812	#DIV/0!			tet-dinB2 0h	1.04812
	tet-dinB2 4h	1.72055	#DIV/0!			tet-dinB2 4h	1.72055
	tet-dinB2 24h	2.17703	10.1443			tet-dinB2 24h	6.16069
	tet-dinB3 0h	1.00204	#DIV/0!			tet-dinB3 0h	1.00204
	tet-dinB3 4h	1.9094	#DIV/0!			tet-dinB3 4h	1.9094
	tet-dinB3 24h	1.7463	2.28273			tet-dinB3 24h	2.01451

## Sheet: Figure 1E
		replicates (arbitrary units)
		1	2	3	Average	SEM
	empty	0	0	0	0	0
	tet-dinB2	7047.39	7192.68	11025.9	8421.98	1302.62
	tet-dinB2D107A	6630.98	7617.73	8182.91	7477.21	453.478
	Strains

## Sheet: Figure 1F
		empty			tet-dinB2ST			tet-dinB2D107A-ST
		relicates (OD600)			relicates (OD600)			relicates (OD600)
		1	2	3	1	2	3	1	2	3
	0	0.001	0.001	0.001	0.001	0.001	0.001	0.001	0.001	0.001
	900	0.066	0.062	0.056	0.053	0.049	0.042	0.056	0.058	0.058
	1400	0.472	0.439	0.398	0.187	0.161	0.131	0.379	0.365	0.391
	2310	16	18.4	13.6	1.18	0.564	0.488	12.4	11.6	9.6
	2760	71.6	84	61.2	4.548	0.568	0.508	54.4	47.6	39.2
	Time (min)
	Average (OD600)	empty	tet-dinB2ST	tet-dinB2D107A-ST	Strains
	0	0.001	0.001	0.001
	900	0.0613333	0.048	0.0573333
	1400	0.436333	0.159667	0.378333
	2310	16	0.744	11.2
	2760	72.2667	1.87467	47.0667
	Time (min)
	SEM (OD600)	empty	tet-dinB2	tet-dinB2ST	Strains
	0	0	0	0
	900	0.00290593	0.00321455	0.000666667
	1400	0.0214035	0.0161795	0.00751295
	2310	1.38564	0.219101	0.832666
	2760	6.59023	1.33678	4.39596
	Time (min)

## Sheet: Figure 1G
	replicate 1 (arbitrary unit)	rpoB	recA	recA/rpoB	/empty
	empty	12409.8	6794.69	0.547526	1
	tet-dinB2	10516.4	17454.4	1.65973	3.03133
	tet-dinB2D107A	10694.9	8029.93	0.750822	1.3713
	replicate 2 (arbitrary unit)	rpoB	recA	recA/rpoB	/empty
	empty	8431.4	628.163	0.0745028	1
	tet-dinB2	12644.4	15458.3	1.22254	16.4093
	tet-dinB2D107A	6031.1	797.698	0.132264	1.77529
		Average
		recA/rpoB	/empty
	empty	0.311014	1
	tet-dinB2	1.44114	9.72033
	tet-dinB2D107A	0.441543	1.57329

## Sheet: Figure 2A (rifR freq)
		Empty -ATC	Empty +ATC	tet-dinB2 -ATC	tet-dinB2 +ATC	tet-dinB3 -ATC	tet-dinB3 +ATC
	replicates (rifR/108 CFU)	2.72727	15.0943	4.16667	19.697	3.33333	21.25
		3.67647	6.5	59.589	146.721	7.32759	19.6429
		12.8049	6.55738	5.5	34.1463	4.16667	27.907
		5.46875	3.0303	9.52381	35.7143	2.85714	55.2632
		3.75	1.88679	4.01786	52.9851	1.02459	15.8824
		2.08333	6.17284	4.86726	62.1212	4.33333	29
		6.06061	6.25	4.54545	31.0811	0.204918	18.0851
		2.08333	6.18557	0.454545	48	0.892857	7.87037
		3.38542	1.92308	1.15385	63.6364	6.11702	9.45946
		1.83486	0.675676	6.37255	180	1.68269	15.5556
		3.96341	18.1818	8.90411	137.5	5	14.2857
		1.42045	0.943396	11.4583	91.6667	1.59574	15.1685
		1.89394	1.94175	10.9649	11.7021		22.3529
		0.2	7.14286	2.41935	10.1852		7.31707
		3.37838	1.13636	2.39362	21.3333		14.2857
		0.649351	0.746269	6.74603	31.4815
		2.55682	6.84211	2.53165	25.5319
		2.57353	1.78571	2.29592	13.1148
			3.61842		21.6981
			2.08333		28.7234
			3.26087		35.3448
	Average	3.36171	4.85518	8.21694	52.4945	3.21132	19.5551
	SEM	0.656932	0.995898	3.1186	10.3784	0.645734	3.03894
	n	18	21	18	21	12	15
	ratio 1		1.44426		6.38857		6.08941
	ratio 2			2.44427	10.8121	0.955265	4.02766

## Sheet: Figure 2A (mutations spectrum)
		WT pmsg419		WT pmsg419-dinB2		WT pmsg419-dinB3			numbers	Empty	dinB2	dinB3		numbers	Empty	dinB2	dinB3		numbers	Empty	dinB2	dinB3		numbers	Empty	dinB2	dinB3
	17_10_26	CAC>CGC (his442)	pseq157	CTG>CCG (Leu449)	pseq173				CTG>CGG (Leu427)	1	2			CTG(Leu427)	1	2	0		A>T or T>A	2	1	1		Leu427	1	2	0
		??????	pseq158	CTG TCG>CTT GTG (his437-Ser438)	pseq174				TCG>TGG (Ser428)	1				TCG(Ser428)	1	0	0		A>G or T>C	30	56	53		Ser428	1	0	0
		CAC>TAC (his442)	pseq159	??????	pseq175				Gln 429 (CAG => AAG)	2	1			Gln429(CAG)	2	1	0		A>C or T>G	8	27	1		Gln 429	3	1	1
		GAC>GCC (Asp432)	pseq160	??????	pseq176				Gln 429 (CAG => CTG)			1		Gln429(CAG)	1	0	1		G>A or C>T	47	29	14		Asp432	8	12	6
		CAC>CGC (his442)	pseq161	TCG>TTG (Ser447)	pseq177				Gln 429 (CAG => CCG)	1				Asp432(GAC)	2	4	0		G>T or C>A	4	11	2		Asn435	0	8	0
		CAC>TAC (his442)	pseq162	CAC>CGC (his442)	pseq178				Asp 432 (GAC =>TAC)	2	2			Asp432(GAC)	4	8	6		G>C or C>G	8	3	3		Ser 438	20	16	8
		CAC>CCC (his442)	pseq163	CTG>CCG (Leu449)	pseq179				Asp 432 (GAC =>AAC)		2			GAC(Asp432)	2	0	0		G TC>T GT	0	10	0		his 442	52	69	55
			pseq164	CAC>CGC (his442)	pseq180				Asp 432 (GAC => GTC)	2				Asn 435 (AAC)	0	8	0		no rpoB mut.	24	9	8		Arg445	1	1	0
		CAC>TAC (his442)	pseq165		pseq181				Asp 432 (GAC => GCC)	1	2			Ser438(TCG)	20	16	8		Total	123	146	82		Ser447	5	4	2
			pseq166	CTG>CGG (Leu427)	pseq182				Asp 432 (GAC => GGC)	1	6	6		his442(CAC)	24	6	7							Leu449	6	10	1
		CAC>CGC (his442)	pseq167	CAG>AAG (Gln429)	pseq183				GAC>GAG (Asp432)	2				CAC(his442)	28	63	47							Gly 450	0	1	1
		??????	pseq168	CAC>TAC (his442)	pseq184				Asn 435 (AAC>AAA)		8			his442(CAC)	0	0	1							Pro480	1	1	0
		??????	pseq169	GAC>GGC (Asp432)	pseq185				TCG>TTG (Ser438)	20	13	7		CGT(Arg445)	1	1	0							Ile488	0	1	0
		CTG>CGG (Leu427)	pseq170	GGC>AGC (Gly 450)	pseq186				Ser 438 (TCG => TGG)		3	1		TCG(Ser447)	5	4	2							Ser490	1	1	0
			pseq171	CAC>CGC (his442)	pseq187				his 442 (CAC => AAC)			1		CTG(Leu449)	6	10	1							Leu437/Ser438	0	10	0
		CAC>TAC (his442)	pseq172		pseq188				CAC>TAC (his442)	19	6	5		GGC(Gly 450)	0	1	1							no rpoB mut.	24	9	8
		TCG>TTG (Ser438)	pseq205	GAC>GGC (Asp432)	pseq221				his 442 (CAC => GAC)	5		1		CCT(Pro480)	1	1	0							Total	123	146	82
		CTG>CCG (Leu449)	pseq206	CAC>TAC (his442)	pseq222				CAC>CGC (his442)	23	40	46		ATC(Ile488)	0	1	0
		TCG>TGG (Ser428)	pseq207	CAC>TAC (his442)	pseq223				CAC>CCC (his442)	5	23	1		TCG (Ser490)	1	1	0
		??????	pseq208	??????	pseq224				his 442 (CAC => CAA)			1		CTG TCG (Leu437/Ser438)	0	10	0
		TCG => TTG	pseq209	TCG>TTG (Ser438)	pseq225				CGT>TGT (Arg445)	1	1			no rpoB mut.	24	9	8
		CTG>CCG (Leu449)	pseq210	ATC>TTC (Ile488)	pseq226				Arg 445 (CGT => CTT					Total	123	146	82
		TCG>TTG (Ser438)	pseq211	CTG TCG>CTT GTG (his437-Ser438)	pseq227				TCG>TTG (Ser447)	5	4	1
		CAC>TAC (his442)	pseq212		pseq228				Ser 447 (TCG => TGG)			1
			pseq213	TCG>TTG (Ser438)	pseq229				CTG>CCG (Leu449)	6	10	1
		??????	pseq214	AAC>AAA (Asn435)	pseq230				GGC>AGC (Gly 450)		1	1
		??????	pseq215	GAC>GGC (Asp432)	pseq231				CCT>CTT (Pro480)	1	1
			pseq216		pseq232				ATC>TTC (Ile488)		1
		TCG>TTG (Ser447)	pseq217		pseq233				TCG >TTG (Ser490)	1	1
			pseq218	CAC>CGC (his442)	pseq234				Leu437/Ser438 (CTG TCG>CTT GTG)		10
		??????	pseq219		pseq235				no rpoB mut.	24	9	8
		CAC>TAC (his442)	pseq220	??????	pseq236				Total	123	146	82
		TCG>TTG (Ser447)	pseq253	CTG>CCG (Leu449)	pseq269
			pseq254	TCG>TTG (Ser438)	pseq270				percent	Empty	dinB2	dinB3		percent	Empty	dinB2	dinB3		percent	Empty	dinB2	dinB3		percents	Empty	dinB2	dinB3
		TCG => TTG	pseq255	GAC>GGC (Asp432)	pseq271				CTG>CGG (Leu427)	0.813008	1.36986	0		CTG(Leu427)	0.813008	1.36986	0		A>T or T>A	1.62602	0.684932	1.21951		Leu427	0.813008	1.36986	0
		??????	pseq256	GAC>TAC (Asp432)	pseq272				TCG>TGG (Ser428)	0.813008	0	0		TCG(Ser428)	0.813008	0	0		A>G or T>C	24.3902	38.3562	64.6341		Ser428	0.813008	0	0
		??????	pseq257	TCG>TTG (Ser438)	pseq273				Gln 429 (CAG => AAG)	1.62602	0.684932	0		Gln429(CAG)	1.62602	0.684932	0		A>C or T>G	6.50407	18.4932	1.21951		Gln 429	2.43902	0.684932	1.21951
		TCG>TTG (Ser438)	pseq258	CTG TCG>CTT GTG (his437-Ser438)	pseq274				Gln 429 (CAG => CTG)	0	0	1.21951		Gln429(CAG)	0.813008	0	1.21951		G>A or C>T	38.2114	19.863	17.0732		Asp432	6.50407	8.21918	7.31707
		CAC>CGC (his442)	pseq259	TCG>TTG (Ser438)	pseq275				Gln 429 (CAG => CCG)	0.813008	0	0		Asp432(GAC)	1.62602	2.73973	0		G>T or C>A	3.25203	7.53425	2.43902		Asn435	0	5.47945	0
		??????	pseq260		pseq276				Asp 432 (GAC =>TAC)	1.62602	1.36986	0		Asp432(GAC)	3.25203	5.47945	7.31707		G>C or C>G	6.50407	2.05479	3.65854		Ser 438	16.2602	10.9589	9.7561
		TCG>TTG (Ser447)	pseq261	CAC>CCC (his442)	pseq277				Asp 432 (GAC =>AAC)	0	1.36986	0		GAC(Asp432)	1.62602	0	0		G TC>T GT	0	6.84932	0		his 442	42.2764	47.2603	67.0732
			pseq262	TCG >TTG (Ser490)	pseq278				Asp 432 (GAC => GTC)	1.62602	0	0		Asn 435 (AAC)	0	5.47945	0		no rpoB mut.	19.5122	6.16438	9.7561		Arg445	0.813008	0.684932	0
		GAC>GGC (Asp432)	pseq263	GAC>AAC (Asp432)	pseq279				Asp 432 (GAC => GCC)	0.813008	1.36986	0		Ser438(TCG)	16.2602	10.9589	9.7561		Total	100	100	100		Ser447	4.06504	2.73973	2.43902
		CAC>CGC (his442)	pseq264	CTG TCG>CTT GTG (his437-Ser438)	pseq280				Asp 432 (GAC => GGC)	0.813008	4.10959	7.31707		his442(CAC)	19.5122	4.10959	8.53659							Leu449	4.87805	6.84932	1.21951
		??????	pseq265	AAC>AAA (Asn435)	pseq281				GAC>GAG (Asp432)	1.62602	0	0		CAC(his442)	22.7642	43.1507	57.3171							Gly 450	0	0.684932	1.21951
		TCG>TTG (Ser438)	pseq266	AAC>AAA (Asn435)	pseq282				Asn 435 (AAC>AAA)	0	5.47945	0		his442(CAC)	0	0	1.21951							Pro480	0.813008	0.684932	0
		CAC>CGC (his442)	pseq267	CAC>CGC (his442)	pseq283				TCG>TTG (Ser438)	16.2602	8.90411	8.53659		CGT(Arg445)	0.813008	0.684932	0							Ile488	0	0.684932	0
		??????	pseq268	??????	pseq284				Ser 438 (TCG => TGG)	0	2.05479	1.21951		TCG(Ser447)	4.06504	2.73973	2.43902							Ser490	0.813008	0.684932	0
	17_12_06	TCG>TTG (Ser447)	pseq354	TCG>TTG (Ser447)	pseq359				his 442 (CAC => AAC)	0	0	1.21951		CTG(Leu449)	4.87805	6.84932	1.21951							Leu437/Ser438	0	6.84932	0
		TCG>TTG (Ser447)	pseq355	CAC>CCC (his442)	pseq360				CAC>TAC (his442)	15.4472	4.10959	6.09756		GGC(Gly 450)	0	0.684932	1.21951							no rpoB mut.	19.5122	6.16438	9.7561
		TCG >TTG (Ser490)	pseq356	GAC>TAC (Asp432)	pseq361				his 442 (CAC => GAC)	4.06504	0	1.21951		CCT(Pro480)	0.813008	0.684932	0							Total	100	100	100
		GAC>GAG (Asp432)	pseq357	CAC>CGC (his442)	pseq362				CAC>CGC (his442)	18.6992	27.3973	56.0976		ATC(Ile488)	0	0.684932	0
		??????	pseq358	CTG>CGG (Leu427)	pseq363				CAC>CCC (his442)	4.06504	15.7534	1.21951		TCG (Ser490)	0.813008	0.684932	0
		??????	pseq375	TCG>TTG (Ser438)	pseq364				his 442 (CAC => CAA)	0	0	1.21951		CTG TCG (Leu437/Ser438)	0	6.84932	0
		??????	pseq376	AAC>AAA (Asn435)	pseq365				CGT>TGT (Arg445)	0.813008	0.684932	0		no rpoB mut.	19.5122	6.16438	9.7561
		CGT>TGT (Arg445)	pseq377	CTG>CCG (Leu449)	pseq366				Arg 445 (CGT => CTT	0	0	0		Total	100	100	100
		GAC>GAG (Asp432)	pseq378	CAC>TAC (his442)	pseq381				TCG>TTG (Ser447)	4.06504	2.73973	1.21951
		CAC>CCC (his442)	pseq379	CAC>CCC (his442)	pseq382				Ser 447 (TCG => TGG)	0	0	1.21951
		CCT>CTT (Pro480)	pseq380	CTG TCG>CTT GTG (his437-Ser438)	pseq383				CTG>CCG (Leu449)	4.87805	6.84932	1.21951
				GAC>AAC (Asp432)	pseq384				GGC>AGC (Gly 450)	0	0.684932	1.21951
				CTG TCG>CTT GTG (his437-Ser438)	pseq385				CCT>CTT (Pro480)	0.813008	0.684932	0
				CGT>TGT (Arg445)	pseq386				ATC>TTC (Ile488)	0	0.684932	0
				CAC>CCC (his442)	pseq387				TCG >TTG (Ser490)	0.813008	0.684932	0
				CAC>TAC (his442)	pseq388				Leu437/Ser438 (CTG TCG>CTT GTG)	0	6.84932	0
				CAC>CCC (his442)	pseq405				no rpoB mut.	19.5122	6.16438	9.7561
				TCG>TTG (Ser438)	pseq406				Total	100	100	100
				AAC>AAA (Asn435)	pseq407				rifR/108 CHU	4.85518	52.4945	19.5551
				CAC>CGC (his442)	pseq408
				TCG>TTG (Ser438)	pseq409				ratio percent	Empty	dinB2	dinB3		ratio percent	Empty	dinB2	dinB3		ratio percent	Empty	dinB2	dinB3		ratio percent	Empty	dinB2	dinB3
				TCG>TTG (Ser438)	pseq410				CTG>CGG (Leu427)	1	1.68493	0		CTG(Leu427)	1	1.68493	0		A>T or T>A	1	0.421233	0.75		Leu427	1	1.68493	0
				CAC>CCC (his442)	pseq411				TCG>TGG (Ser428)	1	0	0		TCG(Ser428)	1	0	0		A>G or T>C	1	1.5726	2.65		Ser428	1	0	0
				TCG>TTG (Ser438)	pseq412				Gln 429 (CAG => AAG)	1	0.421233	0		Gln429(CAG)	1	0.421233	0		A>C or T>G	1	2.84332	0.1875		Gln 429	1	0.280822	0.5
	18_07_05	Ser 438 (TCG => TTG)	pseq688	his 442 (CAC => CGC)	pseq724	his 442 (CAC => CGC)	pseq748		Gln 429 (CAG => CTG)	#DIV/0!	#DIV/0!	#DIV/0!		Gln429(CAG)	1	0	1.5		G>A or C>T	1	0.519819	0.446809		Asp432	1	1.2637	1.125
			pseq689		pseq725	his 442 (CAC => CGC)	pseq749		Gln 429 (CAG => CCG)	1	0	0		Asp432(GAC)	1	1.68493	0		G>T or C>A	1	2.31678	0.75		Asn435	#DIV/0!	#DIV/0!	#DIV/0!
		his 442 (CAC => CGC)	pseq690	his 442 (CAC => CCC)	pseq726	his 442 (CAC => CGC)	pseq750		Asp 432 (GAC =>TAC)	1	0.842466	0		Asp432(GAC)	1	1.68493	2.25		G>C or C>G	1	0.315925	0.5625		Ser 438	1	0.673973	0.6
		his 442 (CAC => CGC)	pseq691	his 442 (CAC => CCC)	pseq727	his 442 (CAC => CGC)	pseq751		Asp 432 (GAC =>AAC)	#DIV/0!	#DIV/0!	#DIV/0!		GAC(Asp432)	1	0	0		G TC>T GT	#DIV/0!	#DIV/0!	#DIV/0!		his 442	1	1.11789	1.58654
		his 442 (CAC => CGC)	pseq692	his 442 (CAC => CGC)	pseq728	his 442 (CAC => AAC)	pseq752		Asp 432 (GAC => GTC)	1	0	0		Asn 435 (AAC)	#DIV/0!	#DIV/0!	#DIV/0!		no rpoB mut.	1	0.315925	0.5		Arg445	1	0.842466	0
			pseq693	his 442 (CAC => CGC)	pseq729	Asp 332 (GAC => GGC)	pseq753		Asp 432 (GAC => GCC)	1	1.68493	0		Ser438(TCG)	1	0.673973	0.6							Ser447	1	0.673973	0.6
			pseq694	his 442 (CAC => CCC)	pseq730	Asp 332 (GAC => GGC)	pseq754		Asp 432 (GAC => GGC)	1	5.05479	9		his442(CAC)	1	0.210616	0.4375							Leu449	1	1.40411	0.25
		his 442 (CAC => CGC)	pseq695	???????	pseq731		pseq755		GAC>GAG (Asp432)	1	0	0		CAC(his442)	1	1.89555	2.51786							Gly 450	#DIV/0!	#DIV/0!	#DIV/0!
		his 442 (CAC => CGC)	pseq696	his 442 (CAC => CGC)	pseq732	his 442 (CAC => TAC)	pseq756		Asn 435 (AAC>AAA)	#DIV/0!	#DIV/0!	#DIV/0!		his442(CAC)	#DIV/0!	#DIV/0!	#DIV/0!							Pro480	1	0.842466	0
		his 442 (CAC => CGC)	pseq697	his 442 (CAC => CCC)	pseq733	his 442 (CAC => CGC)	pseq757		TCG>TTG (Ser438)	1	0.547603	0.525		CGT(Arg445)	1	0.842466	0							Ile488	#DIV/0!	#DIV/0!	#DIV/0!
			pseq698		pseq734	his 442 (CAC => CGC)	pseq758		Ser 438 (TCG => TGG)	#DIV/0!	#DIV/0!	#DIV/0!		TCG(Ser447)	1	0.673973	0.6							Ser490	1	0.842466	0
		Leu 449 (CTG => CCG)	pseq699	his 442 (CAC => CGC)	pseq735	his 442 (CAC => CGC)	pseq759		his 442 (CAC => AAC)	#DIV/0!	#DIV/0!	#DIV/0!		CTG(Leu449)	1	1.40411	0.25							Leu437/Ser438	#DIV/0!	#DIV/0!	#DIV/0!
		Gln 429 (CAG => AAG)	pseq700	his 442 (CAC => CGC)	pseq736	his 442 (CAC => CCC)	pseq760		CAC>TAC (his442)	1	0.266042	0.394737		GGC(Gly 450)	#DIV/0!	#DIV/0!	#DIV/0!							no rpoB mut.	1	0.315925	0.5
		???????	pseq701	his 442 (CAC => CGC)	pseq737	his 442 (CAC => CGC)	pseq761		his 442 (CAC => GAC)	1	0	0.3		CCT(Pro480)	1	0.842466	0
		Asp 332 (GAC =>TAC)	pseq702	his 442 (CAC => CGC)	pseq738	his 442 (CAC => CGC)	pseq762		CAC>CGC (his442)	1	1.46516	3		ATC(Ile488)	#DIV/0!	#DIV/0!	#DIV/0!
		his 442 (CAC => CCC)	pseq703	his 442 (CAC => CGC)	pseq739	his 442 (CAC => CGC)	pseq763		CAC>CCC (his442)	1	3.87534	0.3		TCG (Ser490)	1	0.842466	0
		his 442 (CAC => TAC)	pseq704	his 442 (CAC => CCC)	pseq740	his 442 (CAC => CGC)	pseq764		his 442 (CAC => CAA)	#DIV/0!	#DIV/0!	#DIV/0!		CTG TCG (Leu437/Ser438)	#DIV/0!	#DIV/0!	#DIV/0!
		his 442 (CAC => TAC)	pseq705	his 442 (CAC => CCC)	pseq741	his 442 (CAC => CGC)	pseq765		CGT>TGT (Arg445)	1	0.842466	0		no rpoB mut.	1	0.315925	0.5
		his 442 (CAC => TAC)	pseq706	leu 437/Ser 438 (CTG TCG => CTT GTG)	pseq742	Ser 438 (TCG => TTG)	pseq766		Arg 445 (CGT => CTT	#DIV/0!	#DIV/0!	#DIV/0!
		his 442 (CAC => CGC)	pseq707	his 442 (CAC => CGC)	pseq743	his 442 (CAC => CGC)	pseq767		TCG>TTG (Ser447)	1	0.673973	0.3
		his 442 (CAC => CGC)	pseq708	his 442 (CAC => CCC)	pseq744	his 442 (CAC => CGC)	pseq768		Ser 447 (TCG => TGG)	#DIV/0!	#DIV/0!	#DIV/0!
		his 442 (CAC => TAC)	pseq709	his 442 (CAC => CGC)	pseq745	his 442 (CAC => CGC)	pseq769		CTG>CCG (Leu449)	1	1.40411	0.25
		his 442 (CAC => CGC)	pseq710	his 442 (CAC => CGC)	pseq746	his 442 (CAC => CGC)	pseq770		GGC>AGC (Gly 450)	#DIV/0!	#DIV/0!	#DIV/0!
		his 442 (CAC => TAC)	pseq711	Ser 438 (TCG => TTG)	pseq747	his 442 (CAC => CGC)	pseq771		CCT>CTT (Pro480)	1	0.842466	0
	18_08_07	his 442 (CAC => CCC)	pseq836	Asp 332 (GAC => GCC)	pseq859	his 442 (CAC => CGC)	pseq872		ATC>TTC (Ile488)	#DIV/0!	#DIV/0!	#DIV/0!
		his 442 (CAC => CGC)	pseq837	his 442 (CAC => CGC)	pseq860		pseq873		TCG >TTG (Ser490)	1	0.842466	0
		Gln 429 (CAG => CCG)	pseq838	his 442 (CAC => CCC)	pseq861	Ser 438 (TCG => TTG)	pseq874		Leu437/Ser438 (CTG TCG>CTT GTG)	#DIV/0!	#DIV/0!	#DIV/0!
		Leu 449 (CTG => CCG)	pseq839	Leu 449 (CTG => CCG)	pseq862	his 442 (CAC => CGC)	pseq875		no rpoB mut.	1	0.315925	0.5
		his 442 (CAC => TAC)	pseq840	Asn 435 (AAC => AAA)	pseq863	his 442 (CAC => TAC)	pseq876
		his 442 (CAC => TAC)	pseq841	his 442 (CAC => CGC)	pseq864	his 442 (CAC => CGC)	pseq877		rifR/108 CHU	Empty	dinB2	dinB3		rifR/108 CHU	Empty	dinB2	dinB3		rifR/108 CHU	Empty	dinB2	dinB3		rifR/108 CHU	Empty	dinB2	dinB3
		his 442 (CAC => TAC)	pseq842	his 442 (CAC => CCC)	pseq865	his 442 (CAC => CGC)	pseq878		CTG>CGG (Leu427)	0.039473	0.719103	0		CTG(Leu427)	0.039473	0.719103	0		A>T or T>A	0.0789461	0.359551	0.238476		Leu427	0.039473	0.719103	0
		his 442 (CAC => TAC)	pseq843	Ser 447 (TCG => TTG)	pseq866	his 442 (CAC => CGC)	pseq879		TCG>TGG (Ser428)	0.039473	0	0		TCG(Ser428)	0.039473	0	0		A>G or T>C	1.18419	20.1349	12.6392		Ser428	0.039473	0	0
		Leu 449 (CTG => CCG)	pseq844	Leu 449 (CTG => CCG)	pseq867	his 442 (CAC => CGC)	pseq880		Gln 429 (CAG => AAG)	0.0789461	0.359551	0		Gln429(CAG)	0.0789461	0.359551	0		A>C or T>G	0.315784	9.70789	0.238476		Gln 429	0.118419	0.359551	0.238476
		his 442 (CAC => TAC)	pseq845	Ser 438 (TCG => TGG)	pseq868	Asp 332 (GAC => GGC)	pseq881		Gln 429 (CAG => CTG)	0	0	0.238476		Gln429(CAG)	0.039473	0	0.238476		G>A or C>T	1.85523	10.427	3.33867		Asp432	0.315784	4.31462	1.43086
			pseq846	Ser 438 (TCG => TGG)	pseq869	Ser 438 (TCG => TTG)	pseq882		Gln 429 (CAG => CCG)	0.039473	0	0		Asp432(GAC)	0.0789461	1.43821	0		G>T or C>A	0.157892	3.95506	0.476953		Asn435	0	2.87641	0
		his 442 (CAC => CCC)	pseq847	his 442 (CAC => CCC)	pseq870	his 442 (CAC => TAC)	pseq883		Asp 432 (GAC =>TAC)	0.0789461	0.719103	0		Asp432(GAC)	0.157892	2.87641	1.43086		G>C or C>G	0.315784	1.07865	0.715429		Ser 438	0.789461	5.75282	1.90781
				Ser 438 (TCG => TGG)	pseq871				Asp 432 (GAC =>AAC)	0	0.719103	0		GAC(Asp432)	0.0789461	0	0		G TC>T GT	0	3.59551	0		his 442	2.0526	24.809	13.1162
									Asp 432 (GAC => GTC)	0.0789461	0	0		Asn 435 (AAC)	0	2.87641	0		no rpoB mut.	0.947353	3.23596	1.90781		Arg445	0.039473	0.359551	0
									Asp 432 (GAC => GCC)	0.039473	0.719103	0		Ser438(TCG)	0.789461	5.75282	1.90781		Total	4.85518	52.4945	19.5551		Ser447	0.197365	1.43821	0.476953
									Asp 432 (GAC => GGC)	0.039473	2.15731	1.43086		his442(CAC)	0.947353	2.15731	1.66933							Leu449	0.236838	3.59551	0.238476
	18_10_02	Ser 438 (TCG => TTG)	pseq1040	his 442 (CAC => CGC)	pseq1072	Ser 447 (TCG => TTG)	pseq1096		GAC>GAG (Asp432)	0.0789461	0	0		CAC(his442)	1.10525	22.6517	11.2084							Gly 450	0	0.359551	0.238476
		Ser 438 (TCG => TTG)	pseq1041	his 442 (CAC => CCC)	pseq1073	????????	pseq1097		Asn 435 (AAC>AAA)	0	2.87641	0		his442(CAC)	0	0	0.238476							Pro480	0.039473	0.359551	0
		Ser 438 (TCG => TTG)	pseq1042	his 442 (CAC => CGC)	pseq1074	Asp 332 (GAC => GGC)	pseq1098		TCG>TTG (Ser438)	0.789461	4.67417	1.66933		CGT(Arg445)	0.039473	0.359551	0							Ile488	0	0.359551	0
		Asp 332 (GAC => GTC)	pseq1043	Asp 332 (GAC => GGC)	pseq1075	Asp 332 (GAC => GGC)	pseq1099		Ser 438 (TCG => TGG)	0	1.07865	0.238476		TCG(Ser447)	0.197365	1.43821	0.476953							Ser490	0.039473	0.359551	0
		his 442 (CAC => GAC)	pseq1044	leu 437/Ser 438 (CTG TCG => CTT GTG)	pseq1076	????????	pseq1100		his 442 (CAC => AAC)	0	0	0.238476		CTG(Leu449)	0.236838	3.59551	0.238476							Leu437/Ser438	0	3.59551	0
		Ser 438 (TCG => TTG)	pseq1045	his 442 (CAC => CCC)	pseq1077	????????	pseq1101		CAC>TAC (his442)	0.749988	2.15731	1.19238		GGC(Gly 450)	0	0.359551	0.238476							no rpoB mut.	0.947353	3.23596	1.90781
		his 442 (CAC => GAC)	pseq1046	????????	pseq1078	his 442 (CAC => CGC)	pseq1102		his 442 (CAC => GAC)	0.197365	0	0.238476		CCT(Pro480)	0.039473	0.359551	0							Total	4.85518	52.4945	19.5551
		his 442 (CAC => GAC)	pseq1047	Ser 438 (TCG => TTG)	pseq1079	his 442 (CAC => CGC)	pseq1103		CAC>CGC (his442)	0.90788	14.3821	10.9699		ATC(Ile488)	0	0.359551	0
		his 442 (CAC => GAC)	pseq1048	his 442 (CAC => CGC)	pseq1080	????????	pseq1104		CAC>CCC (his442)	0.197365	8.26968	0.238476		TCG (Ser490)	0.039473	0.359551	0
		Asp 332 (GAC => GTC)	pseq1049	Asn 435 (AAC => AAA)	pseq1081	his 442 (CAC => CCC)	pseq1105		his 442 (CAC => CAA)	0	0	0.238476		CTG TCG (Leu437/Ser438)	0	3.59551	0
		his 442 (CAC => CGC)	pseq1050	his 442 (CAC => CGC)	pseq1082	his 442 (CAC => CGC)	pseq1106		CGT>TGT (Arg445)	0.039473	0.359551	0		no rpoB mut.	0.947353	3.23596	1.90781
		his 442 (CAC => GAC)	pseq1051	his 442 (CAC => CGC)	pseq1083	his 442 (CAC => CGC)	pseq1107		Arg 445 (CGT => CTT	0	0	0		Total	4.85518	52.4945	19.5551
		Leu 449 (CTG => CCG)	pseq1052	his 442 (CAC => CGC)	pseq1084	his 442 (CAC => CGC)	pseq1108		TCG>TTG (Ser447)	0.197365	1.43821	0.238476
		????????	pseq1053	his 442 (CAC => CGC)	pseq1085	Ser 447 (TCG => TGG)	pseq1109		Ser 447 (TCG => TGG)	0	0	0.238476
		Ser 438 (TCG => TTG)	pseq1054	his 442 (CAC => CGC)	pseq1086	????????	pseq1110		CTG>CCG (Leu449)	0.236838	3.59551	0.238476
		his 442 (CAC => CGC)	pseq1055	his 442 (CAC => CGC)	pseq1087	his 442 (CAC => CGC)	pseq1111		GGC>AGC (Gly 450)	0	0.359551	0.238476
		his 442 (CAC => CGC)	pseq1056	his 442 (CAC => CGC)	pseq1088	Ser 438 (TCG => TGG)	pseq1112		CCT>CTT (Pro480)	0.039473	0.359551	0
		????????	pseq1057	his 442 (CAC => CGC)	pseq1089	Gln 429 (CAG => CTG)	pseq1113		ATC>TTC (Ile488)	0	0.359551	0
		his 442 (CAC => CGC)	pseq1058	Leu 449 (CTG => CCG)	pseq1090	his 442 (CAC => TAC)	pseq1114		TCG >TTG (Ser490)	0.039473	0.359551	0
		????????	pseq1059	Leu 449 (CTG => CCG)	pseq1091	Ser 438 (TCG => TTG)	pseq1115		Leu437/Ser438 (CTG TCG>CTT GTG)	0	3.59551	0
		his 442 (CAC => CGC)	pseq1060	????????	pseq1092	????????	pseq1116		no rpoB mut.	0.947353	3.23596	1.90781
		his 442 (CAC => CGC)	pseq1061	his 442 (CAC => CCC)	pseq1093	Ser 438 (TCG => TTG)	pseq1117		Total	4.85518	52.4945	19.5551
			pseq1062	????????	pseq1094	his 442 (CAC => GAC)	pseq1118
		????????	pseq1063	his 442 (CAC => CCC)	pseq1095	his 442 (CAC => CGC)	pseq1119		ratio rifR/108 CHU	Empty	dinB2	dinB3		ratio rifR/108 CHU	Empty	dinB2	dinB3		ratio rifR/108 CHU	Empty	dinB2	dinB3		ratio rifR/108 CHU	Empty	dinB2	dinB3
	18_10_16	???????	pseq1353	his 442 (CAC => CCC)	pseq1393	?????????	pseq1417		CTG>CGG (Leu427)	1	18.2176	0		CTG(Leu427)	1	18.2176	0		A>T or T>A	1	4.55439	3.02075		Leu427	1	18.2176	0
		???????	pseq1354	Asp 332 (GAC => GGC)	pseq1394	his 442 (CAC => CGC)	pseq1418		TCG>TGG (Ser428)	1	0	0		TCG(Ser428)	1	0	0		A>G or T>C	1	17.0031	10.6733		Ser428	1	0	0
		???????	pseq1355	Ser 438 (TCG => TTG)	pseq1395		pseq1419		Gln 429 (CAG => AAG)	1	4.55439	0		Gln429(CAG)	1	4.55439	0		A>C or T>G	1	30.7421	0.755187		Gln 429	1	3.03626	2.01383
		Ser 438 (TCG => TTG)	pseq1356	his 442 (CAC => CGC)	pseq1396	his 442 (CAC => CGC)	pseq1420		Gln 429 (CAG => CTG)	#DIV/0!	#DIV/0!	#DIV/0!		Gln429(CAG)	1	0	6.0415		G>A or C>T	1	5.62031	1.79959		Asp432	1	13.6632	4.53112
		Ser 438 (TCG => TTG)	pseq1357	Asp 332 (GAC => GCC)	pseq1397	his 442 (CAC => CGC)	pseq1421		Gln 429 (CAG => CCG)	1	0	0		Asp432(GAC)	1	18.2176	0		G>T or C>A	1	25.0492	3.02075		Asn435	#DIV/0!	#DIV/0!	#DIV/0!
		Ser 438 (TCG => TTG)	pseq1358	Pro480 (CCT => CTT	pseq1398	?????????	pseq1422		Asp 432 (GAC =>TAC)	1	9.10878	0		Asp432(GAC)	1	18.2176	9.06225		G>C or C>G	1	3.41579	2.26556		Ser 438	1	7.28703	2.4166
		Ser 438 (TCG => TTG)	pseq1359	his 442 (CAC => CGC)	pseq1399	Gly 450 (GGC => AGC)	pseq1423		Asp 432 (GAC =>AAC)	#DIV/0!	#DIV/0!	#DIV/0!		GAC(Asp432)	1	0	0		G TC>T GT	#DIV/0!	#DIV/0!	#DIV/0!		his 442	1	12.0867	6.39005
			pseq1360	his 442 (CAC => CCC)	pseq1400	his 442 (CAC => CGC)	pseq1424		Asp 432 (GAC => GTC)	1	0	0		Asn 435 (AAC)	#DIV/0!	#DIV/0!	#DIV/0!		no rpoB mut.	1	3.41579	2.01383		Arg445	1	9.10878	0
		Ser 438 (TCG => TTG)	pseq1361		pseq1401	his 442 (CAC => CGC)	pseq1425		Asp 432 (GAC => GCC)	1	18.2176	0		Ser438(TCG)	1	7.28703	2.4166		Total	1	10.8121	4.02766		Ser447	1	7.28703	2.4166
		Ser 438 (TCG => TTG)	pseq1362	Asp 332 (GAC => GGC)	pseq1402	his 442 (CAC => CGC)	pseq1426		Asp 432 (GAC => GGC)	1	54.6527	36.249		his442(CAC)	1	2.2772	1.7621							Leu449	1	15.1813	1.00692
			pseq1363	Leu 449 (CTG => CCG)	pseq1403	his 442 (CAC => CGC)	pseq1427		GAC>GAG (Asp432)	1	0	0		CAC(his442)	1	20.4948	10.1411							Gly 450	#DIV/0!	#DIV/0!	#DIV/0!
		Gln 429 (CAG => AAG)	pseq1364	his 442 (CAC => CGC)	pseq1404	his 442 (CAC => CGC)	pseq1428		Asn 435 (AAC>AAA)	#DIV/0!	#DIV/0!	#DIV/0!		his442(CAC)	#DIV/0!	#DIV/0!	#DIV/0!							Pro480	1	9.10878	0
			pseq1365	his 442 (CAC => CGC)	pseq1405	his 442 (CAC => CAA)	pseq1429		TCG>TTG (Ser438)	1	5.92071	2.11452		CGT(Arg445)	1	9.10878	0							Ile488	#DIV/0!	#DIV/0!	#DIV/0!
		Asp 332 (GAC =>TAC)	pseq1409	his 442 (CAC => CGC)	pseq1406	his 442 (CAC => CGC)	pseq1430		Ser 438 (TCG => TGG)	#DIV/0!	#DIV/0!	#DIV/0!		TCG(Ser447)	1	7.28703	2.4166							Ser490	1	9.10878	0
		?????????	pseq1410	Leu 449 (CTG => CCG)	pseq1407		pseq1431		his 442 (CAC => AAC)	#DIV/0!	#DIV/0!	#DIV/0!		CTG(Leu449)	1	15.1813	1.00692							Leu437/Ser438	#DIV/0!	#DIV/0!	#DIV/0!
		his 442 (CAC => TAC)	pseq1411	leu 437/Ser 438 (CTG TCG => CTT GTG)	pseq1408	his 442 (CAC => TAC)	pseq1432		CAC>TAC (his442)	1	2.87646	1.58987		GGC(Gly 450)	#DIV/0!	#DIV/0!	#DIV/0!							no rpoB mut.	1	3.41579	2.01383
		Ser 438 (TCG => TTG)	pseq1412	his 442 (CAC => TAC)	pseq1433	his 442 (CAC => CGC)	pseq1366		his 442 (CAC => GAC)	1	0	1.2083		CCT(Pro480)	1	9.10878	0
		his 442 (CAC => TAC)	pseq1413		pseq1434		pseq1367		CAC>CGC (his442)	1	15.8414	12.083		ATC(Ile488)	#DIV/0!	#DIV/0!	#DIV/0!
		Ser 438 (TCG => TTG)	pseq1414	his 442 (CAC => CCC)	pseq1435	his 442 (CAC => CGC)	pseq1368		CAC>CCC (his442)	1	41.9004	1.2083		TCG (Ser490)	1	9.10878	0
		his 442 (CAC => CGC)	pseq1415	his 442 (CAC => CGC)	pseq1436	Asp 332 (GAC => GGC)	pseq1369		his 442 (CAC => CAA)	#DIV/0!	#DIV/0!	#DIV/0!		CTG TCG (Leu437/Ser438)	#DIV/0!	#DIV/0!	#DIV/0!
		his 442 (CAC => TAC)	pseq1416	his 442 (CAC => CCC)	pseq1437	his 442 (CAC => CGC)	pseq1370		CGT>TGT (Arg445)	1	9.10878	0		no rpoB mut.	1	3.41579	2.01383
				leu 437/Ser 438 (CTG TCG => CTT GTG)	pseq1438	Leu 449 (CTG => CCG)	pseq1371		Arg 445 (CGT => CTT	#DIV/0!	#DIV/0!	#DIV/0!
				Ser 447 (TCG => TTG)	pseq1439	his 442 (CAC => CGC)	pseq1372		TCG>TTG (Ser447)	1	7.28703	1.2083
				Asn 435 (AAC => AAA)	pseq1440	his 442 (CAC => CGC)	pseq1373		Ser 447 (TCG => TGG)	#DIV/0!	#DIV/0!	#DIV/0!
						Ser 438 (TCG => TTG)	pseq1374		CTG>CCG (Leu449)	1	15.1813	1.00692
						Ser 438 (TCG => TTG)	pseq1375		GGC>AGC (Gly 450)	#DIV/0!	#DIV/0!	#DIV/0!
						his 442 (CAC => CGC)	pseq1376		CCT>CTT (Pro480)	1	9.10878	0
									ATC>TTC (Ile488)	#DIV/0!	#DIV/0!	#DIV/0!
									TCG >TTG (Ser490)	1	9.10878	0
									Leu437/Ser438 (CTG TCG>CTT GTG)	#DIV/0!	#DIV/0!	#DIV/0!
									no rpoB mut.	1	3.41579	2.01383
									rifR/108 CHU (main mut.)	Empty	dinB2	dinB3
									CAC>CGC (his442)	0.90788	14.3821	10.9699
									CAC>CCC (his442)	0.197365	8.26968	0.238476
									TCG>TTG (Ser438)	0.789461	4.67417	1.66933
									Leu437/Ser438 (CTG TCG>CTT GTG)	0	3.59551	0
									CTG>CCG (Leu449)	0.236838	3.59551	0.238476
									Asn 435 (AAC>AAA)	0	2.87641	0
									Asp 432 (GAC => GGC)	0.039473	2.15731	1.43086
									CAC>TAC (his442)	0.749988	2.15731	1.19238
									Ser 438 (TCG => TGG)	0	1.07865	0.238476
									others	1.93418	9.70789	3.57714
									Total	4.85518	52.4945	19.5551
									ratio rifR/108 CHU (main mut.)	Empty	dinB2	dinB3
									CAC>CGC (his442)	1	15.8414	12.083
									CAC>CCC (his442)	1	41.9004	1.2083
									TCG>TTG (Ser438)	1	5.92071	2.11452
									Leu437/Ser438 (CTG TCG>CTT GTG)	#DIV/0!	#DIV/0!	#DIV/0!
									CTG>CCG (Leu449)	1	15.1813	1.00692
									Asn 435 (AAC>AAA)	#DIV/0!	#DIV/0!	#DIV/0!
									Asp 432 (GAC => GGC)	1	54.6527	36.249
									CAC>TAC (his442)	1	2.87646	1.58987
									Ser 438 (TCG => TGG)	#DIV/0!	#DIV/0!	#DIV/0!
									others	1	5.01913	1.84944

## Sheet: Figure 2B
		Empty -ATC	Empty +ATC	tet-dinB2ST -ATC	tet-dinB2ST +ATC	tet-dinB2D107A -ATC	tet-dinB2D107A +ATC
	replicates (rifR/108 CFU)	2.72727	15.0943	7.14286	21.4286	9.83607	9.18367
		3.67647	6.5	2.77778	21.4286	2.65957	1.71875
		12.8049	6.55738	3.86364	47.4138	10.5769	13.8889
		5.46875	3.0303	3.37838	20.8861	12.0968	6.94444
		3.75	1.88679	4.67033	39.7059	5.9633	8.33333
		2.08333	6.17284	13.75	46.7742	4.23729	10.4938
		2.10526	1.19048	15.7258	26.0684	1.00806	6.52174
		8.5	2.63158	16.4706	26.7442	15.0568	34.5833
		4.11765	5.65476	12.1711	25.8523
	Average	5.02596	5.41316	8.88338	30.7002	7.67935	11.4585
	SEM	1.1757	1.39708	1.87245	3.62796	1.74992	3.52579
	n	9	9	9	9	8	8
	ratio 1		1.07704		3.45592		1.49212
	ratio 2			1.7675	5.6714	1.52794	2.11678

[truncated: 33 more sheets: Figure 2C, Figure 2D, Figure 3C, Figure 3D, Figure 3E, Figure 3F, Figure 3G, Figure 3H, Figure 4C, Figure 4D, Figure 5B, Figure 5C, Figure 5E, Figure 5F, Figure 5G, Figure 6C, Figure 6D, Figure 6E, Figure 6F, Figure 6G …]
