# Supplementary figures and images for: Roles for mycobacterial DinB2 in frameshift and substitution mutagenesis
Source: eLife journal article supplement (doi:10.7554/elife.83094), 2023-04-19

vector  
DinB2-STII  
D107A  
L14F

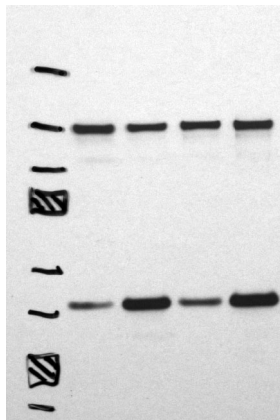

RpoB

RecA

Supplement: fig1-data1 [file elife-83094-fig1-data1-v1.zip]

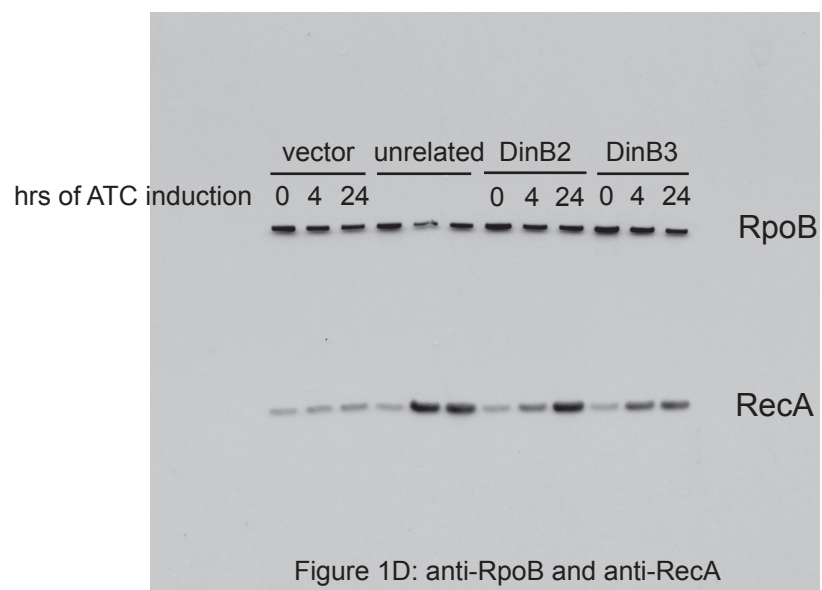

Supplement: fig1-data1 [file elife-83094-fig1-data1-v1.zip]

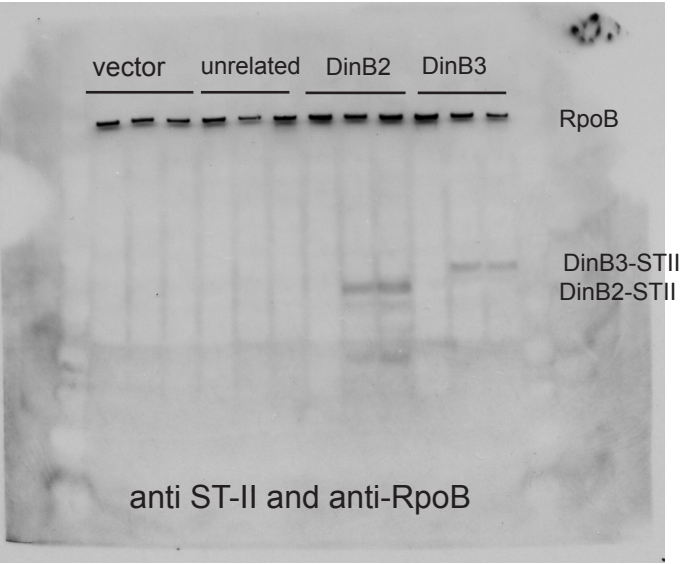

Supplement: fig1-figsupp1-data1 [file 1A western annotated.pdf › Fig1-fig supp 1 source gel data/1A western annotated.pdf]

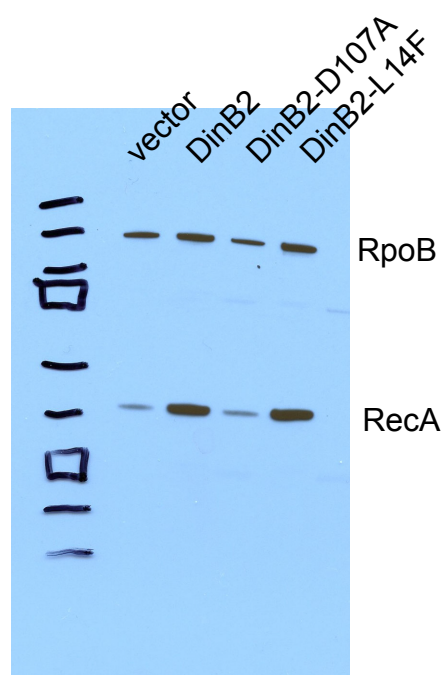

Supplement: fig5-data1 [file elife-83094-fig5-data1-v1.zip]
